# Supplementary material for: Chiral derivatization-enabled discrimination and on-tissue detection of proteinogenic amino acids by ion mobility mass spectrometry
Source: Royal Society of Chemistry journal article supplement (doi:10.1039/d2sc03604e), 2022-01-01
Supplement: d2sc03604e1.pdf [file d2sc03604e1.pdf]

Electronic Supporting Information

**Chiral derivatization-enabled discrimination and on-tissue  
detection of proteinogenic amino acids by ion mobility mass  
spectrometry**

Chengyi Xie<sup>a</sup>, Yanyan Chen<sup>a</sup>, Xiaoxiao Wang<sup>a</sup>, Yuanyuan Song<sup>a</sup>, Yuting Shen<sup>a</sup>, Xin Diao<sup>a</sup>,  
Lin Zhu<sup>a</sup>, Jianing Wang,<sup>a,b,\*</sup> and Zongwei Cai,<sup>a,\*</sup>

<sup>a</sup> State Key Laboratory of Environmental and Biological Analysis, Department of Chemistry,  
Hong Kong Baptist University, Hong Kong SAR, China

<sup>b</sup> Institute for Research and Continuing Education, Hong Kong Baptist University, Hong Kong  
SAR, China

## Table of Contents

|                                                                                                                                          |    |
|------------------------------------------------------------------------------------------------------------------------------------------|----|
| <b>1.1 Animal preparation</b> .....                                                                                                      | 3  |
| <b>1.2 Amino acids extraction from mouse brain tissue</b> .....                                                                          | 3  |
| <b>1.3 Sample preparation for MALDI MSI</b> .....                                                                                        | 3  |
| <b>Table S1.</b> Parameters of direct-infusion TIMS-MS in Tune .....                                                                     | 5  |
| <b>Table S2.</b> Parameters of MALDI TIMS-MS in Tune.....                                                                                | 6  |
| <b>Table S3.</b> Parameters in Tune for Q-TOF only mode .....                                                                            | 7  |
| <b>Table S4.</b> Elution orders and <i>R</i> of FDAA-AA diastereomers obtained from TIMS-MS.....                                         | 8  |
| <b>Table S5.</b> Lists of product ions from precursor ions [FDAA-AA + 2Na – H] <sup>+</sup> . .....                                      | 9  |
| <b>Table S6.</b> Extracting windows of <i>m/z</i> and mobility in Fig. S18.....                                                          | 10 |
| <b>Fig. S1.</b> Mass spectra of DL-Trp and DL-Ser (D: L = 1: 1) after FDAA derivatization .....                                          | 11 |
| <b>Fig. S2.</b> Overlay EIMs of a single chiral amino acid standard after FDAA derivatization .....                                      | 12 |
| <b>Fig. S3.</b> EIMs of Trp standards (100 μM) before derivatization. ....                                                               | 13 |
| <b>Fig. S4.</b> EIMs of 19 pairs of proteinogenic AA (D:L = 1:1) standards after FDVA derivatization. ....                               | 14 |
| <b>Fig. S5.</b> Mass spectra of AAs with multiple reaction sites (DL-Lys and DL-Tyr).....                                                | 15 |
| <b>Fig. S6.</b> EIMs of bis-derivatives of (A) Tyr and (B) Lys .....                                                                     | 16 |
| <b>Fig. S7.</b> Determination of the reaction site of Tyr with FDAA by the combination of TIMS and tandem mass spectrometry (MS/MS)..... | 17 |
| <b>Fig. S8.</b> EIMs of mono-derivatives of Cys. ....                                                                                    | 18 |
| <b>Fig. S9.</b> Mass spectra of 38 mixed amino acids corresponding to Fig. 4. ....                                                       | 19 |
| <b>Fig. S10.</b> Separately listed EIMs of the mixture of 38 chiral AAs corresponding to Fig. 4.....                                     | 20 |
| <b>Fig. S11.</b> EIMs of 15 AAs measured in the mouse brain extracts after FDAA derivatization .....                                     | 21 |
| <b>Fig. S12.</b> An example of amino acid (Ala) identification in mouse brain extracts using FDAA derivatization by TIMS-MS.....         | 22 |
| <b>Fig. S13.</b> Mass spectra and EIMs of Tyr and Trp measured in the mouse brain extracts after FDAA derivatization.....                | 23 |
| <b>Fig. S14.</b> The plot of peak area ratio against enantiomeric ratio of Lys after FDAA derivatization....                             | 24 |
| <b>Fig. S15.</b> EIMs of <i>m/z</i> 418.040 ± 0.01 measured in the mouse brain section and Cys standards after FDAA derivatization.....  | 25 |
| <b>Fig. S16.</b> Confirmation of FDAA-AAs observed in Fig. 6 by tandem mass spectrometry .....                                           | 26 |
| <b>Fig. S17.</b> Mass spectra of DL-Trp and DL-Ser after FDAA derivatization acquired by MALDI on a single spot .....                    | 27 |
| <b>Fig. S18.</b> Extracting windows of <i>m/z</i> and mobility in Fig. 6 .....                                                           | 28 |
| <b>Fig. S19.</b> MALDI TIMS MSI of endogenous chiral amino acids in a mouse brain tissue section.....                                    | 29 |

## **1.1 Animal preparation**

C57Bl/6 mice were obtained from Laboratory Animal Service Centre at The Chinese University of Hong Kong (Hong Kong SAR, China). The mice were housed in standard conditions with a 12h light /12h dark cycle and fed with sterilized water and standard laboratory feed. The mice were sacrificed, and brain tissues were dissected and stored at -80 °C prior to metabolites extraction and section preparation. Experimental protocols were approved by the Hong Kong Baptist University Committee on the Use of Human and Animal Subjects in Teaching and Research.

## **1.2 Amino acids extraction from mouse brain tissue**

The preparation of mouse brain extracts followed the workflow previously reported<sup>1</sup>. 50 mg of brain tissue samples were homogenized in 500  $\mu$ L of ice-cold MeOH/H<sub>2</sub>O (4:1, v: v) using Bullet Blender Storm 24 (Next Advance, Troy, NY, USA). 300  $\mu$ L of homogenate was extracted and mixed with 180  $\mu$ L of chloroform and 60  $\mu$ L of H<sub>2</sub>O. The mixture was vortexed for 1 min, rested for 5 min to equilibrate to room temperature, and then centrifuged at 20 000 g for 10 min at 4 °C. The up layer was collected, transferred to a 1.5 mL microcentrifuge tube, and stored at -80 °C prior to the FDAA derivatization reaction.

## **1.3 Sample preparation for MALDI MSI**

Mouse brain tissue was cryosectioned at 10  $\mu$ m using CryoStar Nx70 cryostat (Thermal Fisher Scientific, Walldorf, Germany) at a chamber temperature of -20 °C. The tissue cryosections were then transferred onto an indium tin oxide (ITO)-coated glass slide (2.5 cm x 7.5 cm, Delta Technologies, Loveland, CO, USA). The tissue sections were rinsed with cold chloroform for 15s at -18 °C to remove lipids from the tissue section, which was reported to improve the detection of small molecule metabolites<sup>2</sup>. Adjacent tissue slides were stained with hematoxylin and eosin (H&E staining), and optical images were captured using Confocal FLIM Imaging System (Nikon C2si Plus, Japan).

The mixing solution of 38 AAs (About 212  $\mu$ M of each AA) was prepared in an aqueous NaHCO<sub>3</sub> (100 mM) solution and then was diluted twice using MeOH. Half of the brain section

was covered with a coverslip (Corning, NY, USA) to prevent standards from depositing on this half. The AA mixture was applied to the tissue section covering the dimensions of 2.6 cm x 3 cm using a custom-built matrix deposition system. The setup of the spray system is similar to our previously reported electrospray deposition device<sup>3</sup>. The AA mixture was delivered by a syringe pump (Chemyx Fusion 101, Chemyx, Stafford, TX, USA) with a flow rate of 10  $\mu\text{L}/\text{min}$  for 30 min through a 100  $\mu\text{m}$  i.d. quartz capillary (IDEX Corp., Northbrook, IL, USA) to the spray nozzle with  $\text{N}_2$  sheath gas (99.995 %) of 70 psi heated to 50 °C. The spraying voltage was set to +5 kV using a high voltage power supply (PS 350, Stanford Research Systems, Sunnyvale, CA, USA). The motorized stage was set at a velocity of 1098 mm/min with 1 mm track spacing.

On-tissue FDAA derivatization was performed in a light-proof reaction chamber for 60 min using the homemade deposition system. FDAA (20 mM) in a MeOH/THF (1:1, v/v) solution and an aqueous  $\text{NaHCO}_3$  (100 mM) solution were delivered at a flow rate of 15  $\mu\text{L}/\text{min}$  separately and mixed online in a PEEK tee (IDEX Corp., Northbrook, IL, USA). The sheath gas was set to 35 psi, and the target plate was heated to 45 °C. The deposition dimensions were set to 2.6 cm x 3 cm to ensure at least 0.5 cm spacing between the deposition edge and the tissue on each slide.

After derivatization, a DHAP solution (5 mg/mL) in MeOH was applied onto the tissue section using the same settings as the deposition of AAs, except that the flow rate, thickness and dimensions were changed to 30  $\mu\text{L}/\text{min}$ , 13 cycles and 2.6 cm x 3 cm, respectively.

**Table S1.** Parameters of direct-infusion TIMS-MS in Tune

| Transfer         |                       |                   |                        |
|------------------|-----------------------|-------------------|------------------------|
| Funnel 1 RF      | 350.0 V <sub>pp</sub> | isCID Energy      | 0.0 eV                 |
| Funnel 2 RF      | 350.0 V <sub>pp</sub> | Deflection Delta  | 70.0 V                 |
| Multipole RF     | 350.0 V <sub>pp</sub> |                   |                        |
| Quadrupole       |                       |                   |                        |
| Ion Energy       | 5.0 eV                | Low Mass          | 300.00 <i>m/z</i>      |
| Collision Cell   |                       |                   |                        |
| Collision Energy | 10.0 eV               | Collision RF      | 1800.0 V <sub>pp</sub> |
| Focus Pre TOF    |                       |                   |                        |
| Transfer Time    | 60.0 $\mu$ s          | Pre Pulse Storage | 8.0 $\mu$ s            |

**Table S2.** Parameters of MALDI TIMS-MS in Tune

| Transfer           |                       |                    |                        |
|--------------------|-----------------------|--------------------|------------------------|
| MALDI Plate Offset | 50.0 V                | Deflection 1 Delta | 70.0 V                 |
| Funnel 1 RF        | 200.0 V <sub>pp</sub> | isCID Energy       | 0.0 eV                 |
| Funnel 2 RF        | 220.0 V <sub>pp</sub> | Multipole RF       | 220.0 V <sub>pp</sub>  |
| Quadrupole         |                       |                    |                        |
| Ion Energy         | 5.0 eV                | Low Mass           | 150.00 <i>m/z</i>      |
| Collision Cell     |                       |                    |                        |
| Collision Energy   | 10.0 eV               | Collision RF       | 1500.0 V <sub>pp</sub> |
| Focus Pre TOF      |                       |                    |                        |
| Transfer Time      | 60.0 $\mu$ s          | Pre Pulse Storage  | 5.0 $\mu$ s            |

**Table S3.** Parameters in Tune for Q-TOF only mode (TIMS was switched off)

| Transfer         |                       |                   |                       |
|------------------|-----------------------|-------------------|-----------------------|
| Funnel 1 RF      | 350.0 V <sub>pp</sub> | isCID Energy      | 0.0 eV                |
| Funnel 2 RF      | 350.0 V <sub>pp</sub> | Deflection Delta  | 70.0 V                |
| Multipole RF     | 350.0 V <sub>pp</sub> |                   |                       |
| Quadrupole       |                       |                   |                       |
| Ion Energy       | 5.0 eV                | Low Mass          | 50.00 <i>m/z</i>      |
| Collision Cell   |                       |                   |                       |
| Collision Energy | 10.0 eV               | Collision RF      | 400.0 V <sub>pp</sub> |
| Focus Pre TOF    |                       |                   |                       |
| Transfer Time    | 60.0 $\mu$ s          | Pre Pulse Storage | 8.0 $\mu$ s           |

**Table S4.** Elution orders and  $R$  of FDAA-AA diastereomers obtained from TIMS-MS

| FDAA-AA          | First eluting AA | $R_D$ | $R_L$ |
|------------------|------------------|-------|-------|
| Ala              | L                | 123.3 | 147.5 |
| Arg              | L                | 146.7 | 134.4 |
| Asn              | L                | 112.7 | 148.1 |
| Asp              | L                | 93.8  | 168.4 |
| Cys <sup>a</sup> | L                | 154.7 | 115.7 |
| Cys <sup>b</sup> | D                | 184.9 | 114.4 |
| Gln              | L                | 165.4 | 164.9 |
| Glu              | L                | 122.4 | 146.9 |
| His              | L                | 176.5 | 172.0 |
| Leu              | L                | 144.3 | 164.6 |
| Ile              | L                | 146.5 | 164.6 |
| Lys <sup>a</sup> | L                | 150.3 | 153.8 |
| Lys <sup>b</sup> | L                | 162.0 | 161.4 |
| Met              | L                | 140.9 | 147.4 |
| Phe              | L                | 157.9 | 134.0 |
| Pro              | L                | 140.0 | 181.4 |
| Ser              | L                | 137.4 | 141.5 |
| Thr              | L                | 157.8 | 160.8 |
| Trp              | L                | 154.0 | 163.5 |
| Tyr              | L                | 163.5 | 107.1 |
| Val              | L                | 172.7 | 132.4 |

<sup>a</sup>mono-derivatives<sup>b</sup>bis-derivatives



**Table S5.** Lists of product ions from precursor ions [FDAA-AA + 2Na – H]<sup>+</sup> corresponding to Fig. S16.

| Amino acids | precursor ions | Product ions (excluding 'R <sup>1</sup> ' group)             | Product ions (including 'R' group) |
|-------------|----------------|--------------------------------------------------------------|------------------------------------|
| Ala         | 386.07         | 87.98, 91.97, 196.01, 208.01, 265.03, 294.02, 309.04         | 324.07, 342.08                     |
| Ser         | 402.06         | 87.98, 91.97, 196.01, 208.01, 265.03, 310.05                 | 340.06, 358.07                     |
| Pro         | 412.08         | 87.98, 91.97, 196.01, 208.01                                 | 350.09                             |
| Val         | 414.10         | 87.98, 91.97, 196.01, 208.01, 265.03, 294.02, 309.04         | 352.10, 370.11                     |
| Thr         | 416.08         | 87.98, 91.97, 196.01, 208.01, 265.03, 294.02, 310.05         |                                    |
| Ile, Leu    | 428.12         | 87.98, 91.97, 196.01, 208.01, 265.03, 294.02, 309.04         | 366.11, 384.12                     |
| Asn         | 429.07         | 87.98, 91.97, 196.01, 265.03, 294.02, 309.04, 310.05         | 367.07                             |
| Gln         | 443.09         | 87.98, 91.97, 196.01, 208.01, 294.02, 309.04, 310.05         | 381.09                             |
| Met         | 446.07         | 87.98, 91.97, 196.01                                         | 384.07                             |
| His         | 452.09         | 87.98, 91.97, 196.01, 208.01, 265.03, 294.02, 309.04, 310.05 | 390.09                             |
| Phe         | 462.10         | 87.98, 91.97, 196.01, 208.01, 265.03, 294.02, 309.04, 310.05 | 400.10                             |
| Arg         | 471.13         | 87.98, 91.97, 196.01, 208.01, 265.03, 294.02, 309.04         | 409.13                             |
| Tyr         | 478.09         | 87.98, 91.97, 196.01, 208.01, 265.03, 294.02, 309.05, 310.05 | 416.10                             |
| Trp         | 501.11         | 87.98, 91.97, 196.01, 208.01, 265.03, 294.02, 309.04, 310.05 |                                    |

<sup>1</sup>a side chain specific to each AA

**Table S6.** Extracting windows of  $m/z$  and mobility in Fig. S18

| FDAA-AA            | $m/z$ up limit | $m/z$ lower limit | $1/k_0$ up limit | $1/k_0$ lower limit |
|--------------------|----------------|-------------------|------------------|---------------------|
| D-Ala              | 386.059        | 386.079           | 0.8960           | 0.9080              |
| L-Ala              | 386.059        | 386.079           | 0.9120           | 0.9260              |
| D-Arg              | 471.122        | 471.142           | 0.9895           | 0.9975              |
| L-Arg              | 471.122        | 471.142           | 0.9985           | 1.0065              |
| D-Asn              | 429.064        | 429.084           | 0.9265           | 0.9365              |
| L-Asn              | 429.064        | 429.084           | 0.9380           | 0.9480              |
| D-Asp              | 430.048        | 430.068           | 0.9200           | 0.9360              |
| L-Asp              | 430.048        | 430.068           | 0.9400           | 0.9520              |
| D-Gln              | 443.079        | 443.099           | 0.9460           | 0.9560              |
| L-Gln              | 443.079        | 443.099           | 0.9580           | 0.9680              |
| D-Glu              | 444.063        | 444.083           | 0.9500           | 0.9580              |
| L-Glu              | 444.063        | 444.083           | 0.9610           | 0.9670              |
| D-His              | 452.080        | 452.100           | 0.9580           | 0.9660              |
| L-His              | 452.080        | 452.100           | 0.9810           | 0.9880              |
| D-Leu              | 428.105        | 428.125           | 0.9700           | 0.9706              |
| L-Leu              | 428.105        | 428.125           | 0.9830           | 0.9890              |
| D-Ile              | 428.105        | 428.125           | 0.9580           | 0.9680              |
| L-Ile              | 428.105        | 428.125           | 0.9770           | 0.9810              |
| D-Lys (di)         | 695.164        | 695.184           | 1.1275           | 1.1415              |
| L-Lys (di)         | 695.164        | 695.184           | 1.1500           | 1.1640              |
| D-Met              | 446.062        | 446.082           | 0.9450           | 0.9590              |
| L-Met              | 446.062        | 446.082           | 0.9650           | 0.9790              |
| D-Phe              | 462.089        | 462.109           | 0.9620           | 0.9740              |
| L-Phe              | 462.089        | 462.109           | 0.9760           | 0.9900              |
| D-Pro              | 412.074        | 412.094           | 0.9140           | 0.9240              |
| L-Pro              | 412.074        | 412.094           | 0.9320           | 0.9440              |
| D-Ser              | 402.055        | 402.075           | 0.8980           | 0.9100              |
| L-Ser              | 402.055        | 402.075           | 0.9120           | 0.9240              |
| D-Thr              | 416.069        | 416.089           | 0.9220           | 0.9320              |
| L-Thr              | 416.069        | 416.089           | 0.9320           | 0.9440              |
| D-Trp              | 501.100        | 501.120           | 1.0060           | 1.0200              |
| L-Trp              | 501.100        | 501.120           | 1.0200           | 1.0340              |
| D-Tyr <sup>1</sup> | 478.084        | 478.104           | 0.9860           | 0.9980              |
| L-Tyr              | 478.084        | 478.104           | 1.0000           | 1.0140              |
| D-Tyr <sup>2</sup> | 478.084        | 478.104           | 1.0280           | 1.0420              |
| D-Val              | 414.090        | 414.110           | 0.9350           | 0.9450              |
| L-Val              | 414.090        | 414.110           | 0.9500           | 0.9620              |

di: bis-derivatives

<sup>1</sup>first eluted mobility peak of D-Tyr<sup>2</sup>second eluted mobility peak of D-Tyr

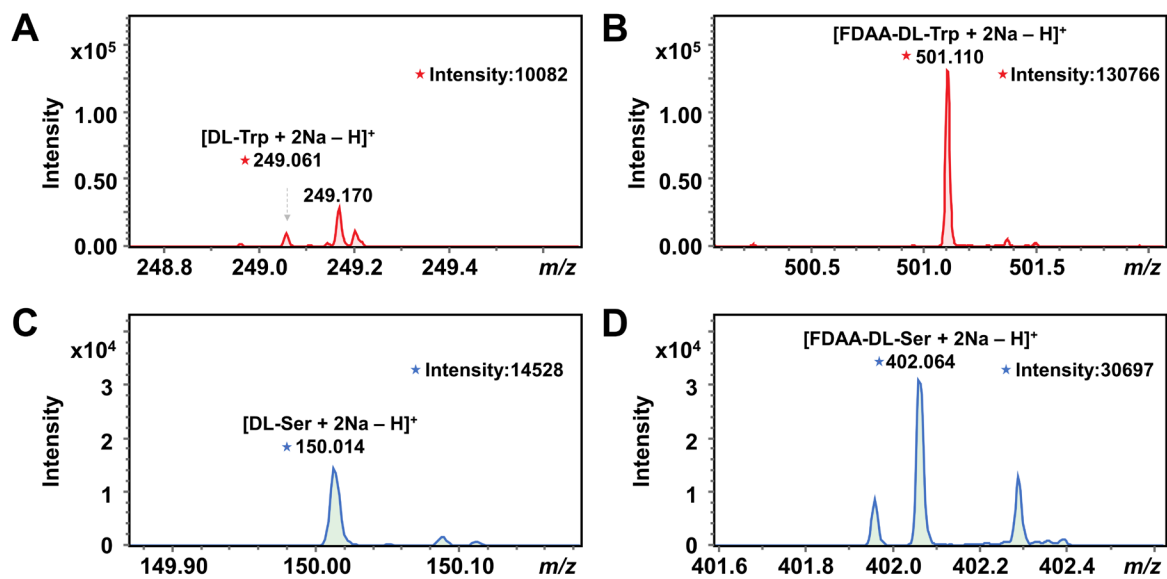

**Fig. S1.** Mass spectra of DL-Trp and DL-Ser (D: L = 1: 1) after FDAA derivatization for the comparison of relative ion intensity (RI) between product and reactant ions. (A) unlabeled Trp. (B) FDAA-labeled Trp. (C) unlabeled Ser. (D) FDAA-labeled Ser. Subfigures with the same color were obtained from the same mass spectrum. In order to observe ions at low  $m/z$ , TIMS was switched off and parameters in Tune was optimized in Table S3.

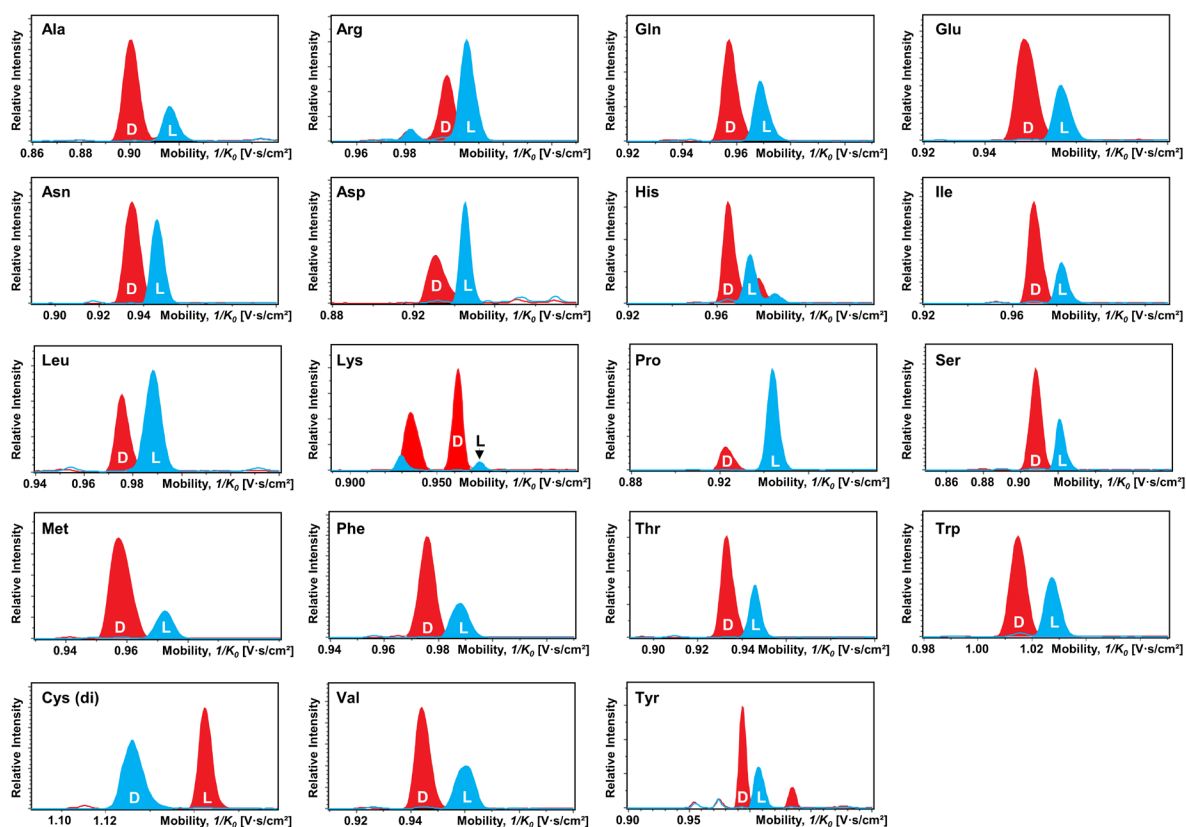

**Fig. S2.** Overlay EIMs of a single chiral amino acid standard after FDAA derivatization. The corresponding D-forms and L-forms were measured by TIMS-MS separately.

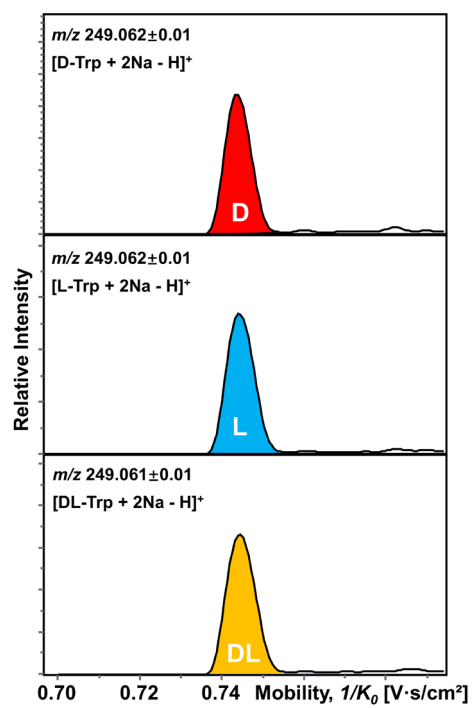

**Fig. S3.** EIMS of Trp standards (100  $\mu$ M) before derivatization. D form, L form, and racemic mixture were measured separately.

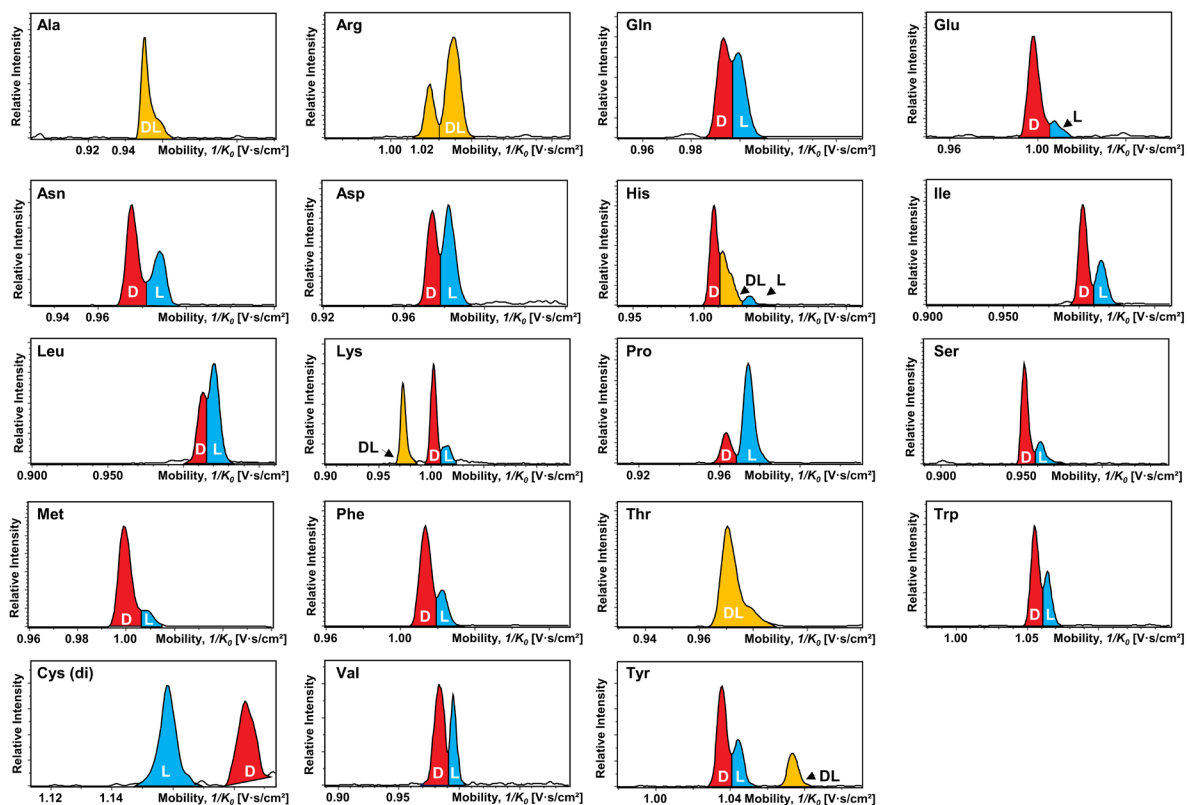

Fig. S4. EIMs of 19 pairs of proteinogenic AA (D:L = 1:1) standards after FDVA derivatization.

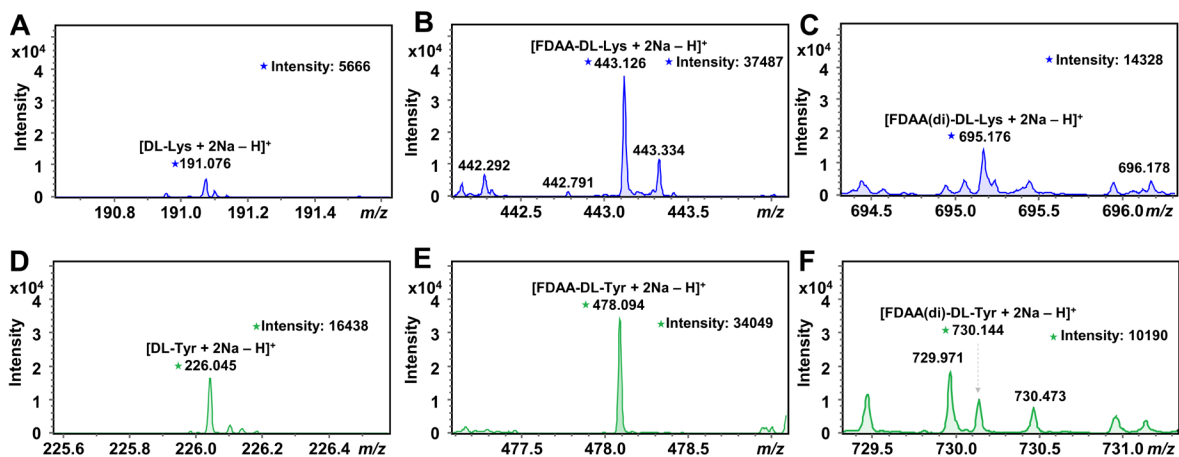

**Fig. S5.** Mass spectra of AAs with multiple reaction sites (DL-Lys and DL-Tyr) obtained after FDAA derivatization for the comparison of relative ion intensity (RI) between mono-derivative and bis-derivative ions. (A) unlabeled Lys. (B) FDAA-labeled Lys. (C) Bis-derivatives of Lys. (D) unlabeled Tyr. (E) FDAA-labeled Tyr. (F) Bis-derivatives of Tyr. Subfigures with the same color were obtained from the same mass spectrum. In order to observe ions at low  $m/z$ , TIMS was switched off and parameters in Tune was optimized in Table S3.

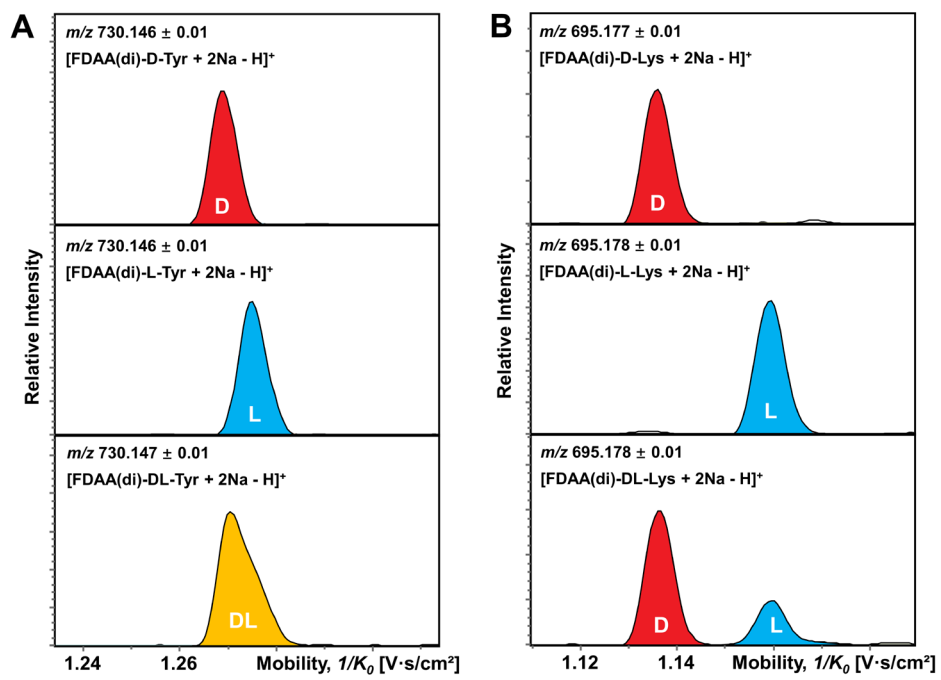

**Fig. S6.** EIMS of bis-derivatives of (A) Tyr and (B) Lys.



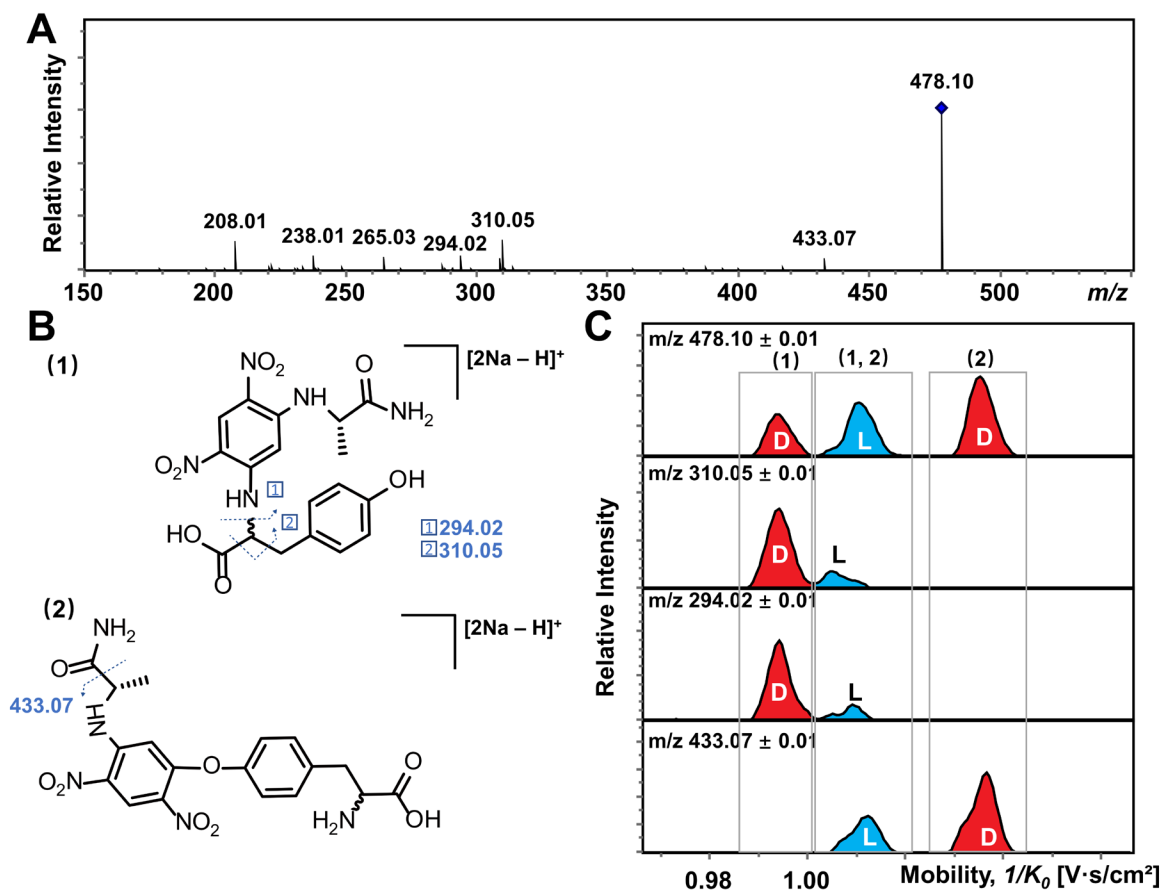

**Fig. S7.** Determination of the reaction site of Tyr with FDAA by the combination of TIMS and tandem mass spectrometry (MS/MS). (A) MS/MS spectrum of FDAA-DL-Tyr. (B) Putative fragmentation sites of Tyr after the reaction of FDAA with (1)  $\alpha$ -amino group and (2) hydroxyl group. (C) EIMS of product ions obtained from TIMS-MS/MS of selected ions at  $m/z$  478.10. Product ions showing the same mobility are derived from the same parent ions, and therefore, product ions at  $m/z$  310.05 and 294.02 are produced from structure (1) and product ions at  $m/z$  433.07 are produced from structure (2).

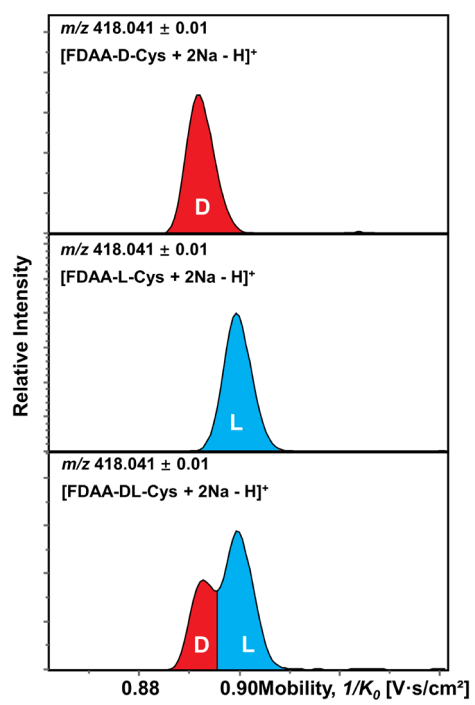

**Fig. S8.** EIMs of mono-derivatives of Cys.

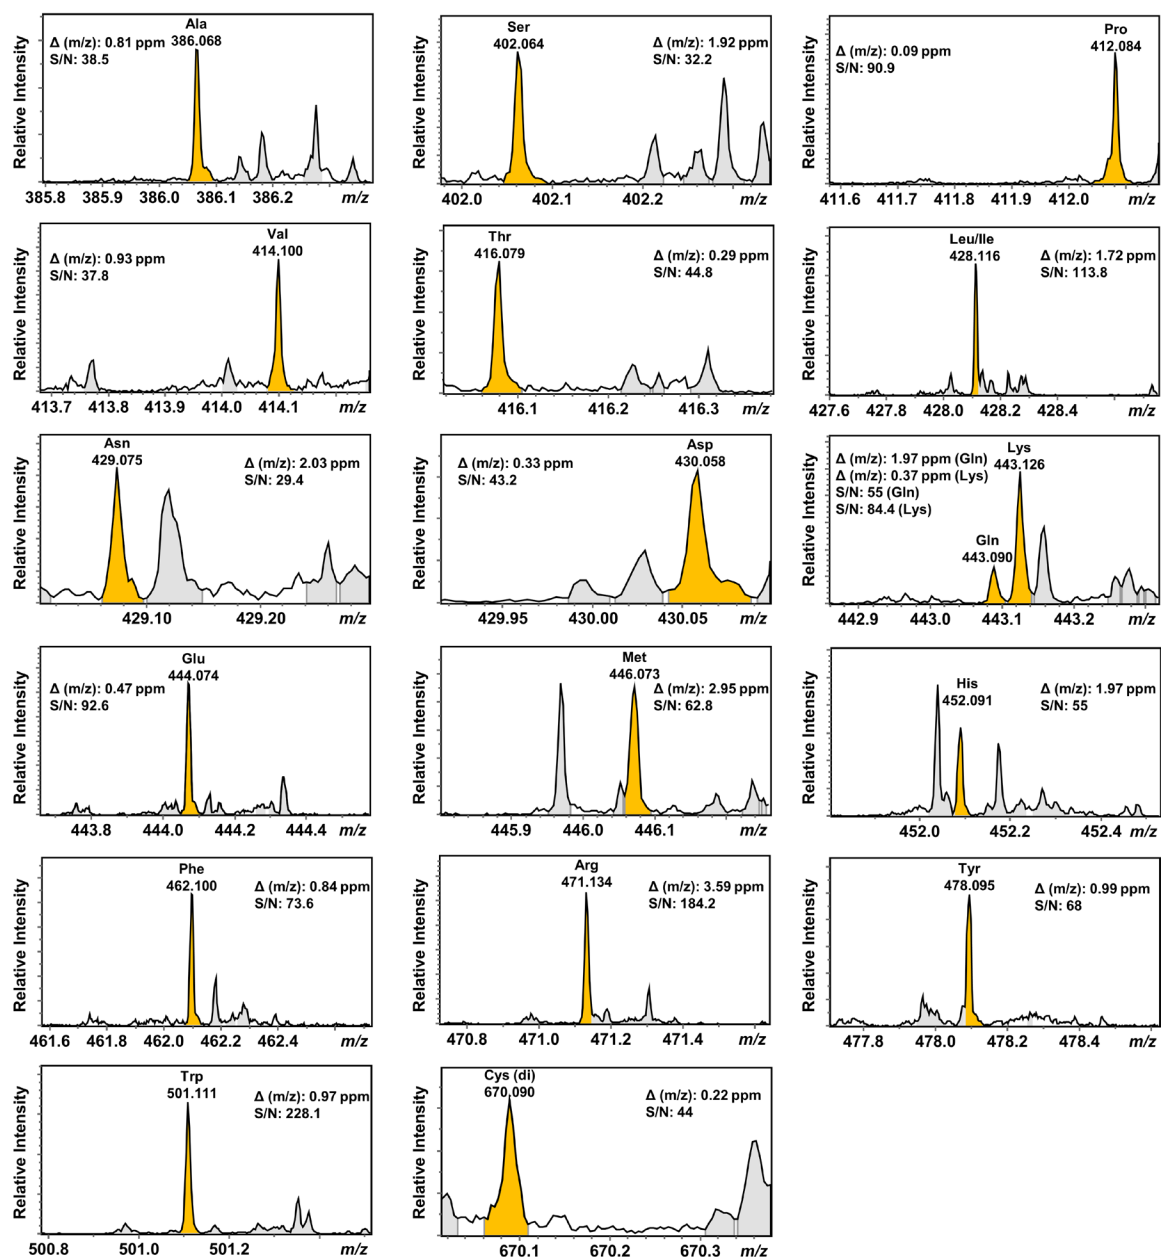

**Fig. S9.** Mass spectra of 38 mixed amino acids corresponding to Fig. 4. The mass deviation and signal to noise ratio (S/N) of highlighted peaks are presented as well.

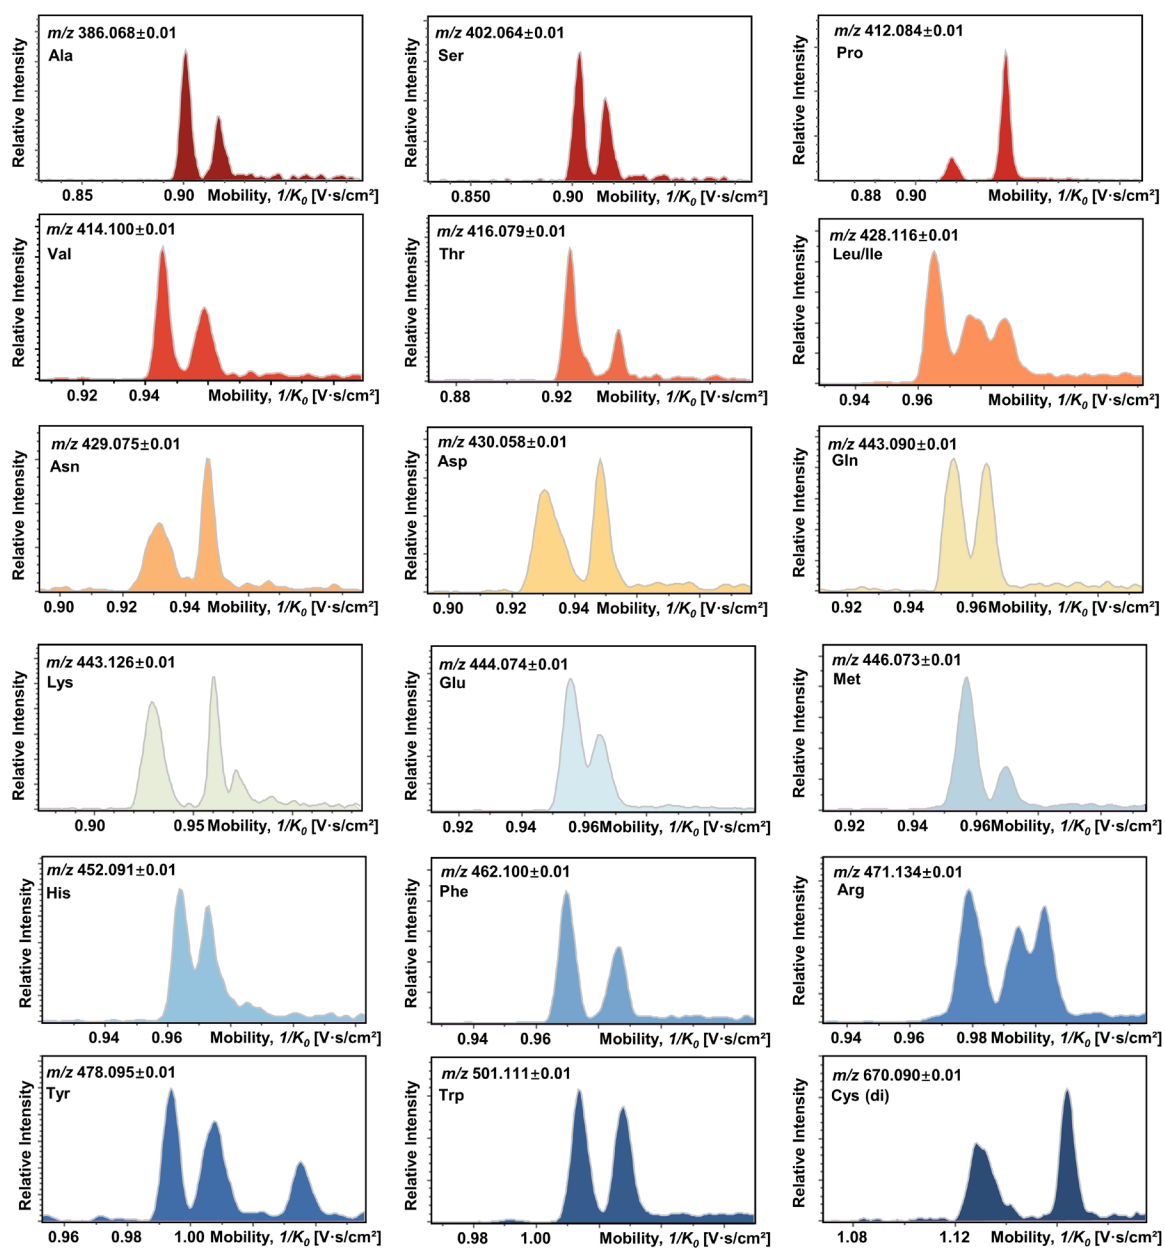

Fig. S10. Separately listed EIMs of the mixture of 38 chiral AAs corresponding to Fig. 4.

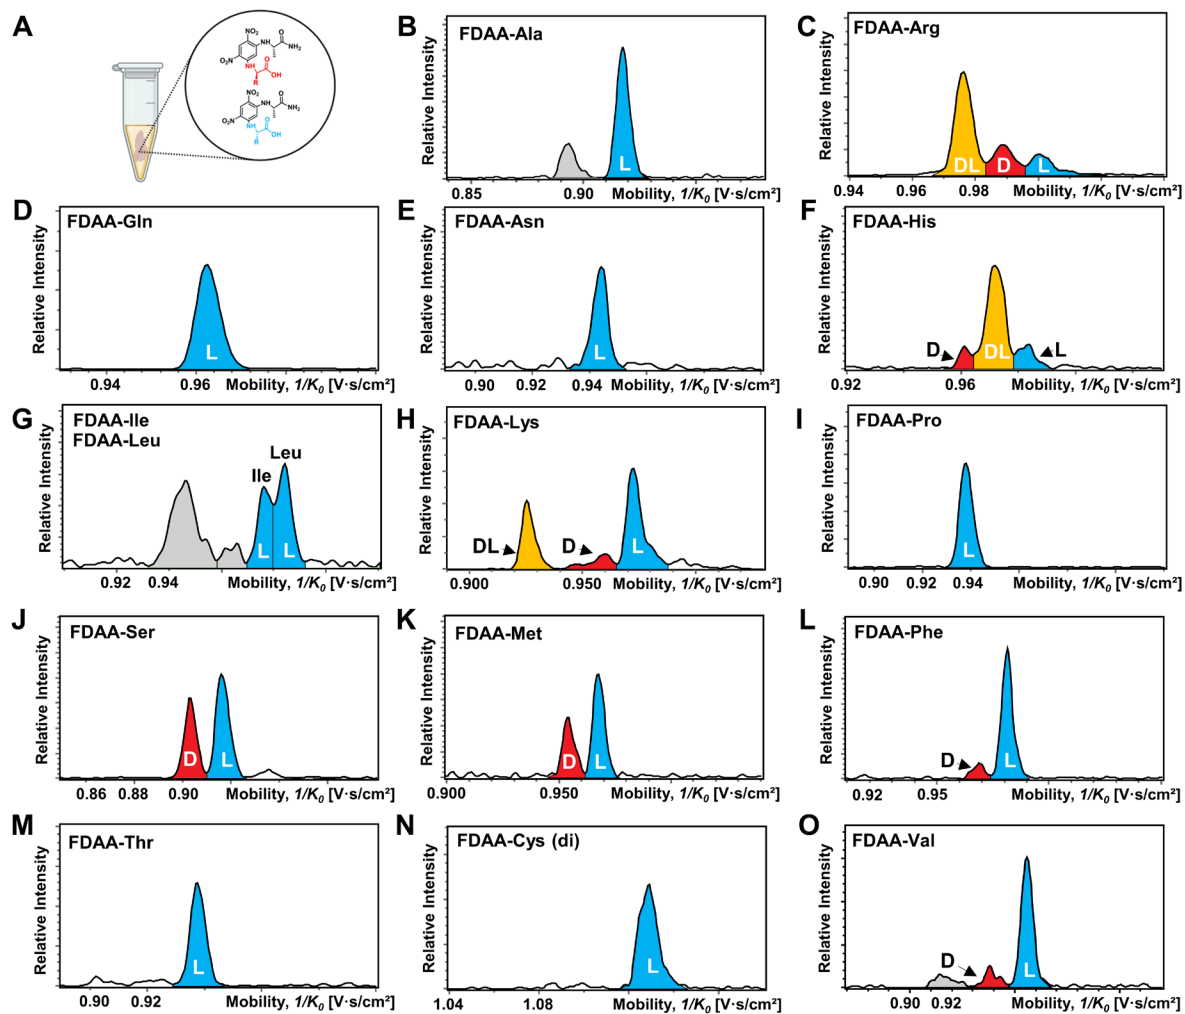

**Fig. S11.** EIMs of 15 AAs measured in the mouse brain extracts after FDAA derivatization. (A) Schematic diagram of mouse brain extracts, which was created with BioRender.com. (B-O) EIMs of FDAA-AA.

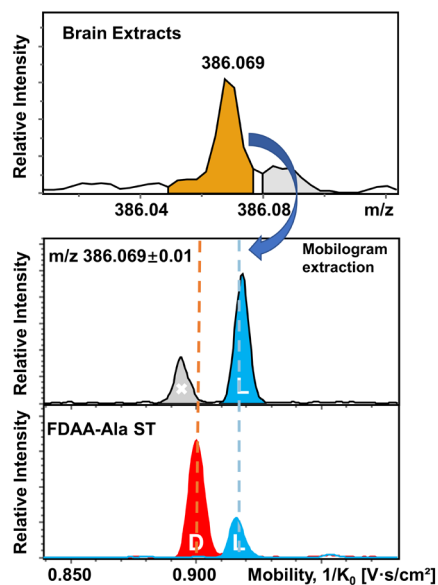

**Fig. S12.** An example of amino acid (Ala) identification in mouse brain extracts using FDAA derivatization by TIMS-MS. Mobility distribution in the EIM of  $m/z$   $386.069 \pm 0.01$  is compared with FDAA-Ala pure standard. Peaks in red, blue, and grey traces represent D-AA, L-AA, and interference ions, respectively.

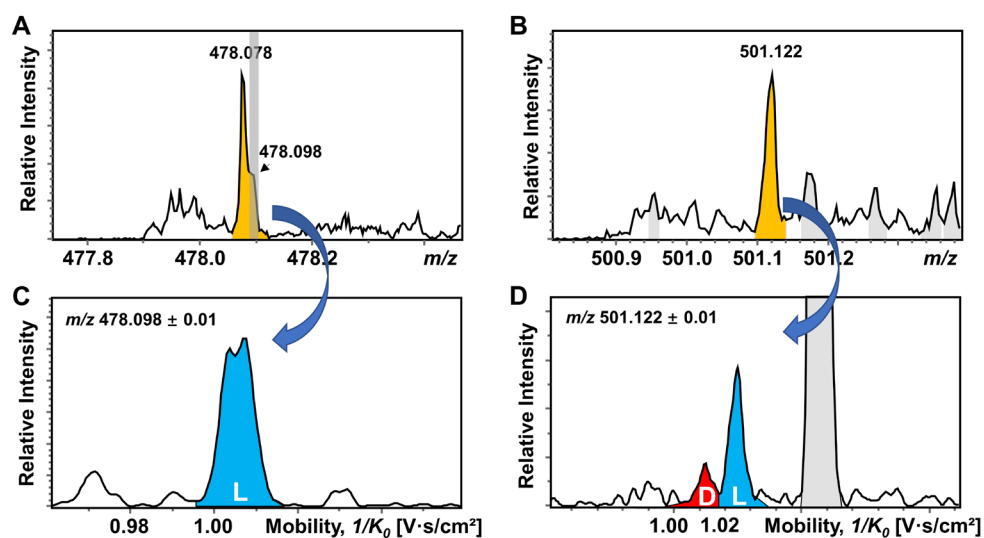

**Fig. S13.** Mass spectra and EIMs of Tyr and Trp measured in the mouse brain extracts after FDAA derivatization. (A) Mass spectrum corresponding to FDAA-Tyr. (B) Mass spectrum corresponding to FDAA-Trp. (C) EIMs of  $m/z$  478.098  $\pm$  0.01. (D) EIMs of  $m/z$  501.122  $\pm$  0.01. Peaks in red, blue, and grey traces represent D-AA, L-AA, and interference ions, respectively. While the  $m/z$  of target analytes are overlapped with an interference peak, the target analytes can be recognized in the EIMs.

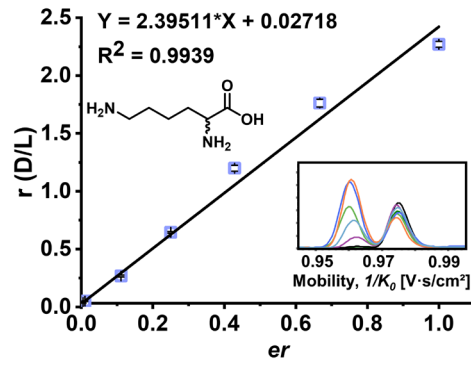

**Fig. S14.** The plot of peak area ratio against enantiomeric ratio (D/L) of Lys after single FDAA derivatization.

The corresponding extracted ion mobilograms of D/L-Lys at different mixing ratios are embedded. Four technical replications of the TIMS-MS analysis were performed.



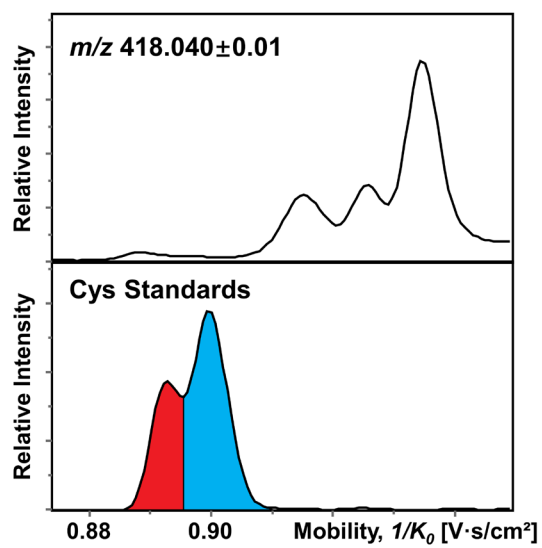

**Fig. S15.** EIMS of  $m/z\ 418.040 \pm 0.01$  measured in the mouse brain section and Cys standards after FDAA derivatization.

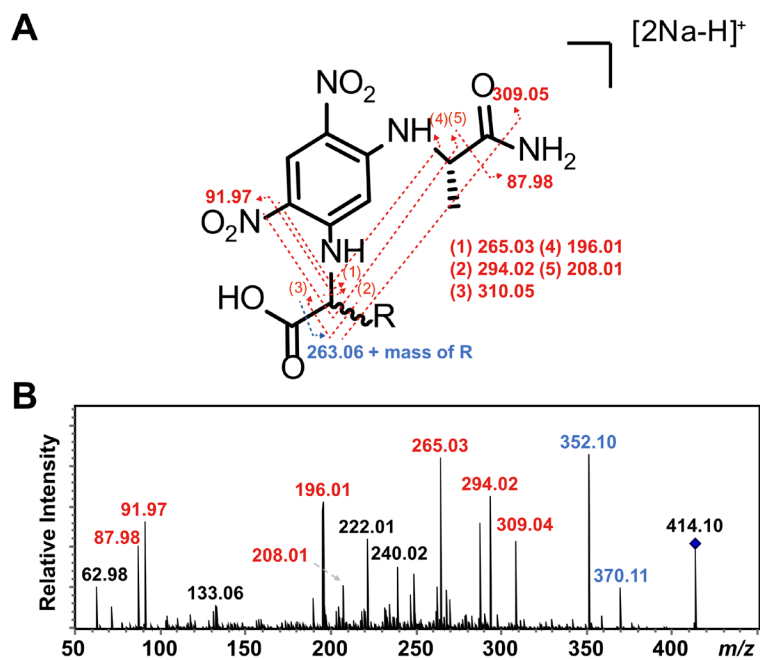

**Fig. S16.** Confirmation of FDAA-AAs observed in Fig. 6 by tandem mass spectrometry (MS/MS). (A) Putative fragmentation sites of ions  $[\text{FDAA-AA} + 2\text{Na} - \text{H}]^+$ , where 'R' represents a side chain specific to each AA. (B) A representative MS/MS spectrum of ions  $[\text{FDAA-Val} + 2\text{Na} - \text{H}]^+$ .

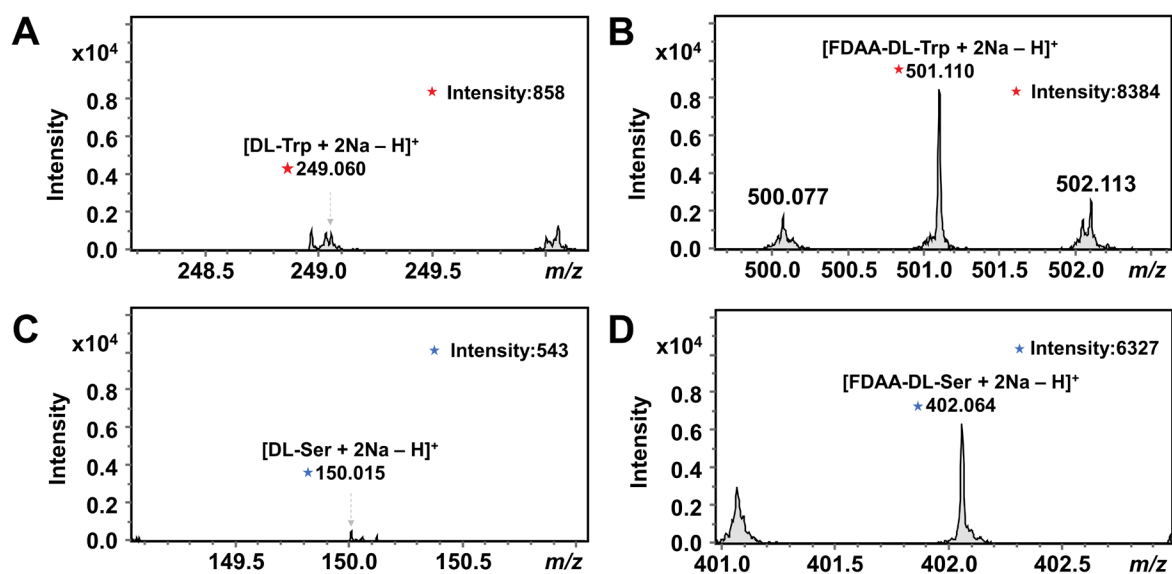

**Fig. S17.** Mass spectra of DL-Trp and DL-Ser after FDAA derivatization acquired by MALDI on a single spot for the comparison of relative ion intensity (RI) between product and reactant ions. (A) unlabeled Trp. (B) FDAA-labeled Trp. (C) unlabeled Ser. (D) FDAA-labeled Ser. All subfigures were obtained from the same mass spectrum. In order to observe ions at low  $m/z$ , TIMS was switched off and parameters in Tune was optimized in Table S3.

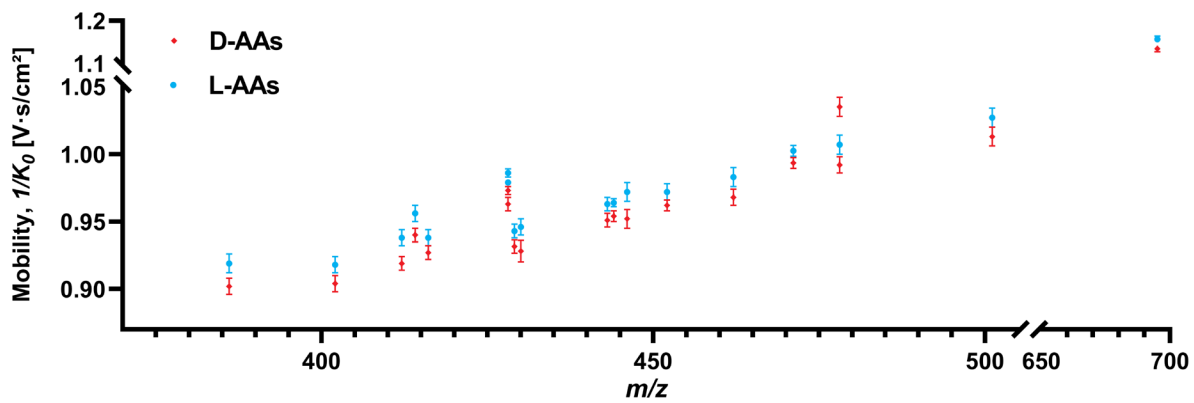

**Fig. S18.** Extracting windows of  $m/z$  and mobility in Fig. 6. Detailed values are listed in Table S6. The windows are set based on that no mutual interference occurs for ion images.

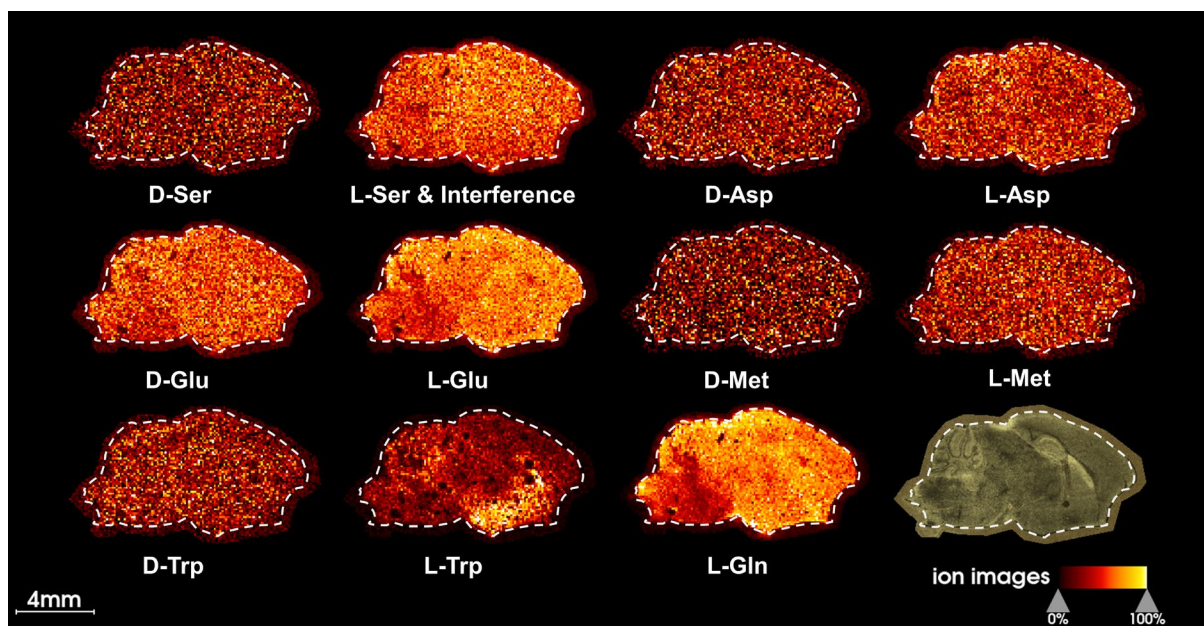

**Fig. S19.** MALDI TIMS MSI of endogenous chiral amino acids in a mouse brain tissue section.

## References

- 1 C. Zhao, P. Xie, H. Wang and Z. Cai, *J. Hazard. Mater.*, 2018, **358**, 503–507.
- 2 H. Yang, W. Ji, M. Guan, S. Li, Y. Zhang, Z. Zhao and L. Mao, *Metabolomics*, 2018, **14**, 50.
- 3 J. Wang, S. Qiu, S. Chen, C. Xiong, H. Liu, J. Wang, N. Zhang, J. Hou, Q. He and Z. Nie, *Anal Chem*, 2015, **87**, 422-430.
